# Supplementary material
Source: PubMed Central journal article supplement (PMC4166774)
Supplement: 97320630010533S1.pdf [file 97320630010533S1.pdf]

## Supplementary material:

**Table 1:** Result given by the epitope conservancy tool

| Number | Epitope   | Percentage of protein sequence matches at $\geq 100\%$ | Minimum identity (%) | Maximum identity (%) |
|--------|-----------|--------------------------------------------------------|----------------------|----------------------|
| 1      | LSGTPPVY  | 100                                                    | 100                  | 100                  |
| 2      | PAAIASNCY | 100                                                    | 100                  | 100                  |
| 3      | CYSSLILDY | 100                                                    | 100                  | 100                  |
| 4      | YSSLILDYF | 100                                                    | 100                  | 100                  |
| 5      | TTITKPLKY | 100                                                    | 100                  | 100                  |
| 6      | ITKPLKYSY | 100                                                    | 100                  | 100                  |
| 7      | STVWEDGDY | 100                                                    | 100                  | 100                  |
| 8      | MTEQLQMGF | 100                                                    | 100                  | 100                  |

**Table 2:** B-cell antigenic determinants from the RBD (S367-S607) of S glycoprotein

| Number | Start Position | End position | Peptide                                      |
|--------|----------------|--------------|----------------------------------------------|
| 1      | 4              | 11           | SGSVVEQA                                     |
| 2      | 13             | 39           | GVECDFSPLLSGTTPPVYNFKRLVFTN                  |
| 3      | 41             | 84           | NYNLTKLLSLFSVNDFTCSQISPAAIASNCYSSLILDYFSYPLS |
| 4      | 88             | 97           | DLSVSSAGPI                                   |
| 5      | 108            | 122          | NPTCLILATVPHNLT                              |
| 6      | 124            | 139          | ITKPLKYSYINKCSRF                             |
| 7      | 147            | 154          | VPQLVNAN                                     |
| 8      | 156            | 166          | YSPCVSIVPST                                  |
| 9      | 175            | 181          | RKQLSPL                                      |
| 10     | 186            | 193          | WLVASGST                                     |
| 11     | 205            | 211          | GITVQYG                                      |
| 12     | 215            | 222          | NSVCPKLE                                     |
